# Supplementary material for: Computational study of two-dimensional SnGe2N4 as a promising photocatalyst for the oxygen evolution reaction
Source: Royal Society of Chemistry journal article supplement (doi:10.1039/d4nj00204k), 2024-01-01
Supplement: d4nj00204k1.pdf [file d4nj00204k1.pdf]

### Supplementary Information

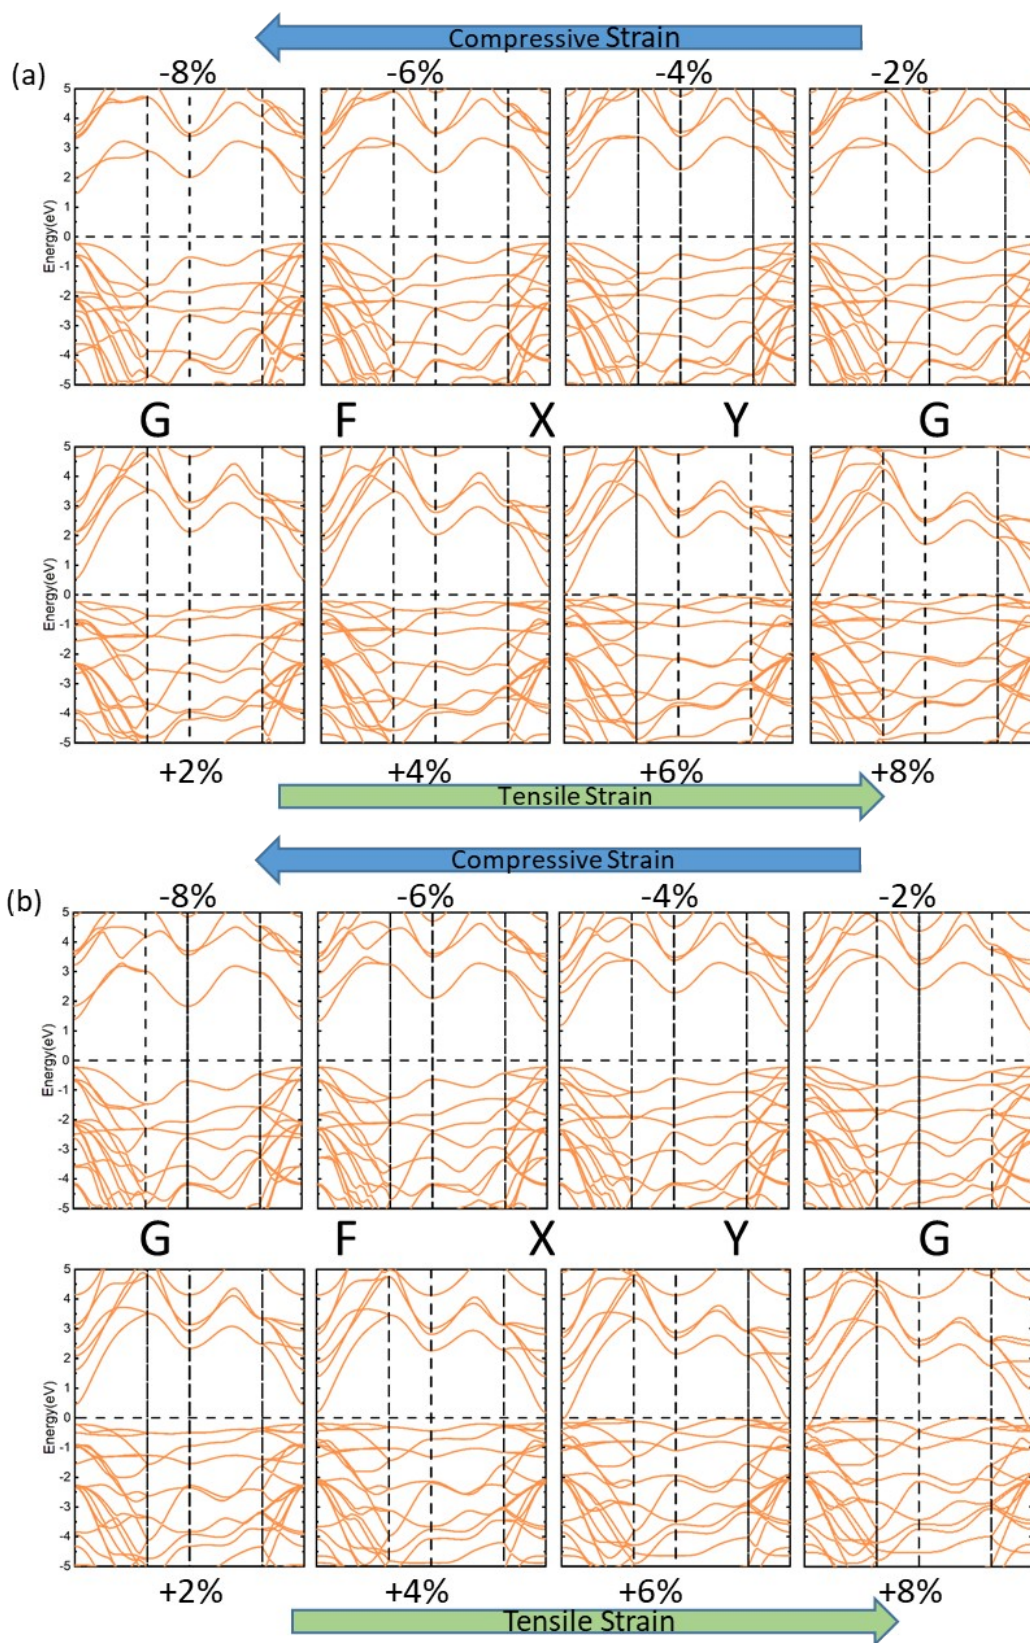

**Figure S1.** Band structure variation under biaxial strain for **(a)** H and **(b)** H' phase SnGe<sub>2</sub>N<sub>4</sub>.

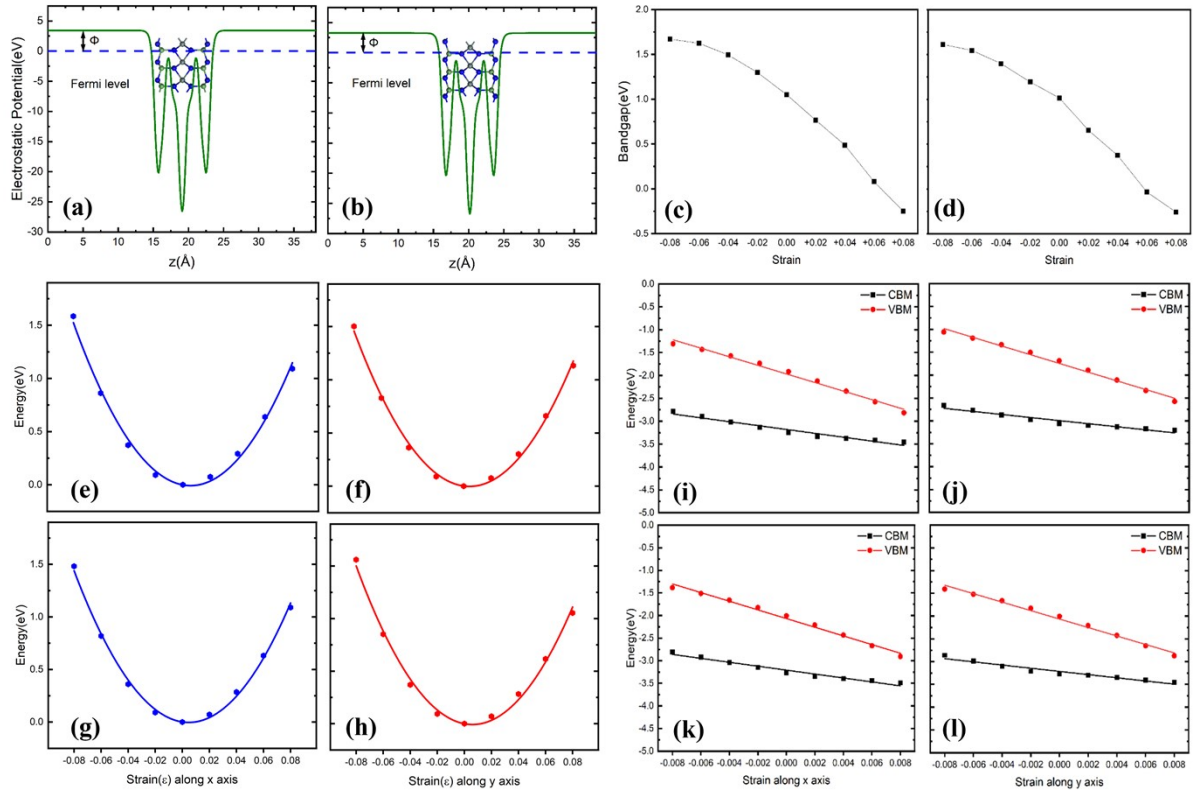

**Figure S2.** **(a, b)** The work function along the z-axis, **(c, d)** bandgap variation with biaxial strain, **(e-h)** Energy strain curve and **(i-l)** variation of CBM and VBM with x and y uniaxial strains for H and H' phase SnGe<sub>2</sub>N<sub>4</sub>, respectively.

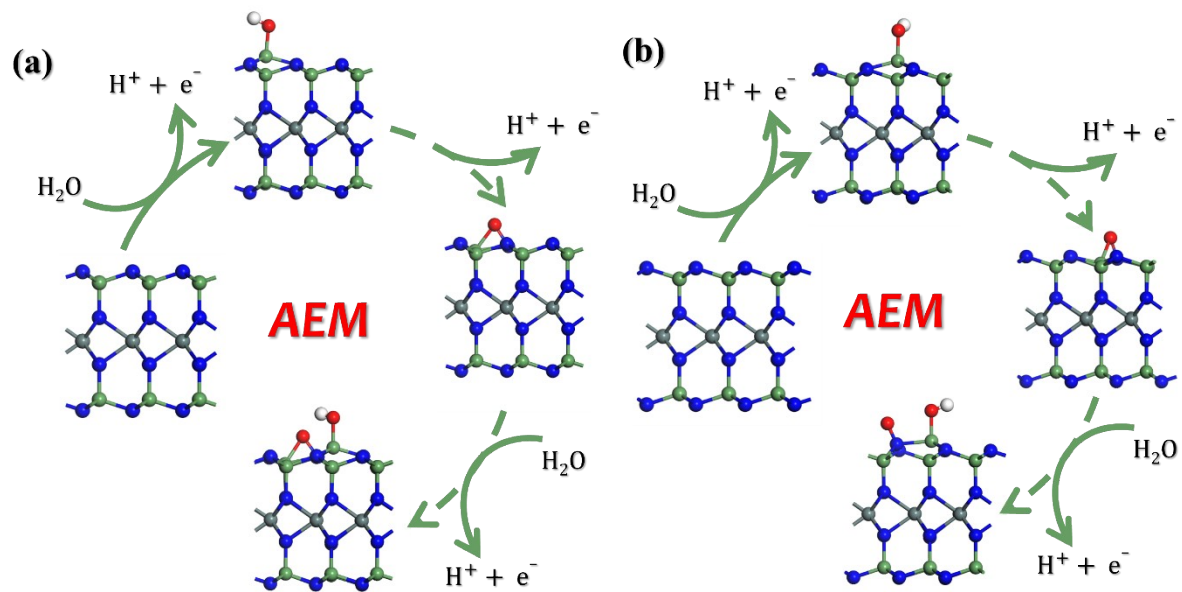

**Figure S3.** The deviation of OER from conventional AEM pathway for (a) H-SnGe<sub>2</sub>N<sub>4</sub> and (b) H'-SnGe<sub>2</sub>N<sub>4</sub>.

**Table S1.** Optimized lattice parameters  $a$  in Å, band gap  $E_g$  in eV, bond lengths  $d_{Sn-N}$  and  $d_{Ge-N}$  in Angstrom (Å), elastic constants  $C_{11}$ ,  $C_{12}$ ,  $C_{22}$  and  $C_{66}$  in  $\text{Nm}^{-1}$ , Young's modulus  $Y_{2D}$  in  $\text{Nm}^{-1}$  and Poisson's ratio  $\nu$  for H and H'  $\text{SnGe}_2\text{N}_4$ .

|           | $a$      | $E_g$<br>(eV) | $d_{Sn-N}$<br>(Å) | $d_{Ge-N}$<br>(Å) | $C_{11}$<br>( $\text{Nm}^{-1}$ ) | $C_{12}$<br>( $\text{Nm}^{-1}$ ) | $C_{22}$<br>( $\text{Nm}^{-1}$ ) | $C_{66}$<br>( $\text{Nm}^{-1}$ ) | $Y_{2D}$<br>( $\text{Nm}^{-1}$ ) | $\nu$    |
|-----------|----------|---------------|-------------------|-------------------|----------------------------------|----------------------------------|----------------------------------|----------------------------------|----------------------------------|----------|
| <b>H</b>  | 3.097879 | 1.0524        | 2.14882           | 1.88698           | 399.479                          | 120.451                          | 393.067                          | 139.465                          | 349.9951                         | 0.306439 |
| <b>H'</b> | 3.099028 | 1.0151        | 2.14975           | 1.88730           | 380.367                          | 116.046                          | 386.904                          | 135.974                          | 386.904                          | 0.299935 |

**Table S2.** Bader charge analysis for H and H' phase  $\text{SnGe}_2\text{N}_4$ .

| System                                  | Bader net charge (e) |         |        |
|-----------------------------------------|----------------------|---------|--------|
|                                         | Sn                   | Ge      | N      |
| <b>H-SnGe<sub>2</sub>N<sub>4</sub></b>  | -1.9402              | -1.9471 | 1.4779 |
| <b>H'-SnGe<sub>2</sub>N<sub>4</sub></b> | -1.9318              | -1.9855 | 1.4755 |
